# Supplementary material
Source: PubMed Central journal article supplement (PMC5542050)
Supplement: NIHMS855012-supplement-supplement_1.pdf [file NIHMS855012-supplement-supplement_1.pdf]

Supplemental Table 1. Cross-classification between menstrual cycle characteristics and self-reported PCOS<sup>1</sup>

|                              | Menstrual cycle irregularity | Cycle length > 35 days | Self-reported PCOS |
|------------------------------|------------------------------|------------------------|--------------------|
| Menstrual cycle irregularity | 224                          |                        |                    |
| Cycle length > 35 days       | 6                            | 39                     |                    |
| Self-reported PCOS           | 19                           | 1                      | 78                 |

<sup>1</sup>Phase 1 not included in this table because the self-reported PCOS question was not directly asked (only asked via infertility diagnoses).

Supplemental Table 2. Diagnostic criteria for PCOS

|                                              | NIH Definition 1990 | Rotterdam Definition 2004 | AES Definition 2008                                      |
|----------------------------------------------|---------------------|---------------------------|----------------------------------------------------------|
| Hyperandrogenism                             | Required            | 2 of 3 required           | Required                                                 |
| Ovulatory dysfunction (oligo- or amenorrhea) | Required            | 2 of 3 required           | Either ovulatory dysfunction or PCOS morphology required |
| PCOS Morphology                              | Not required        | 2 of 3 required           | Either ovulatory dysfunction or PCOS morphology required |
